# Supplementary material for: Enhanced photocatalytic performance of Ag nanoparticle–TiO2−X nanotube arrays obtained by a predischarge–deposition method and calcination in H2/N2
Source: Royal Society of Chemistry journal article supplement (doi:10.1039/d3re00344b), 2023-10-27
Supplement: d3re00344b1.pdf [file d3re00344b1.pdf]

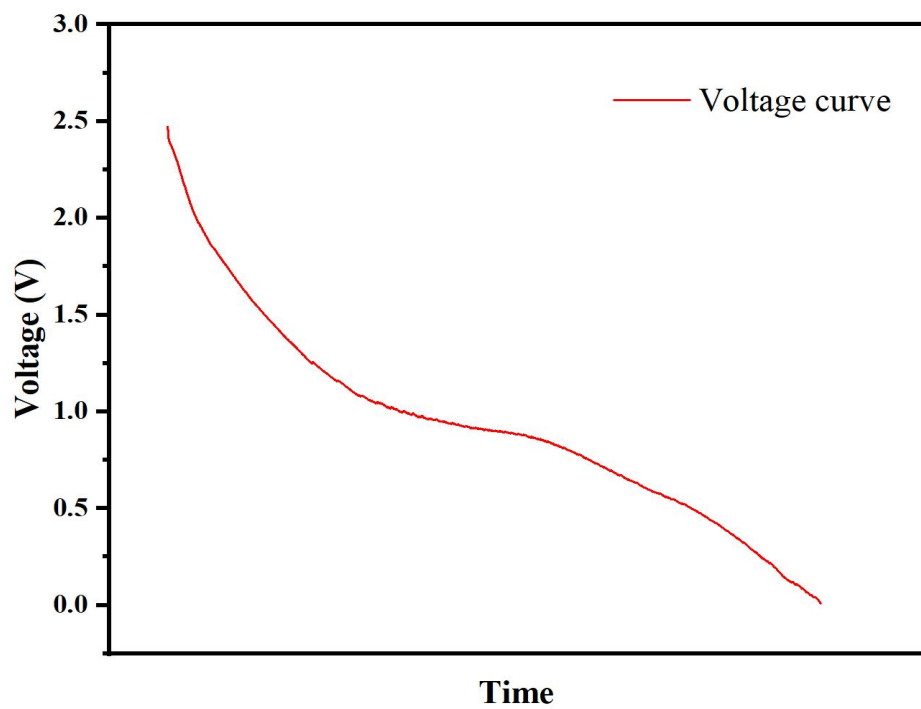

Figure S1. Discharge curve of TiO<sub>2</sub>.

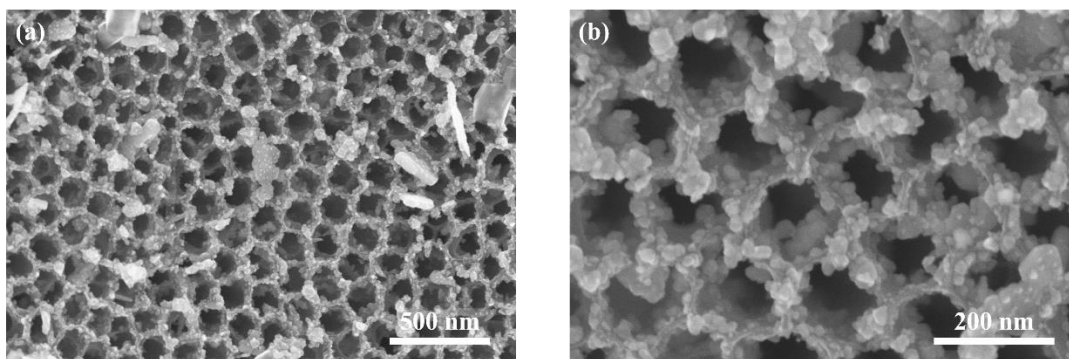

Figure S2. (a, b) The SEM image of 0.01Ag/TiO<sub>2</sub>.

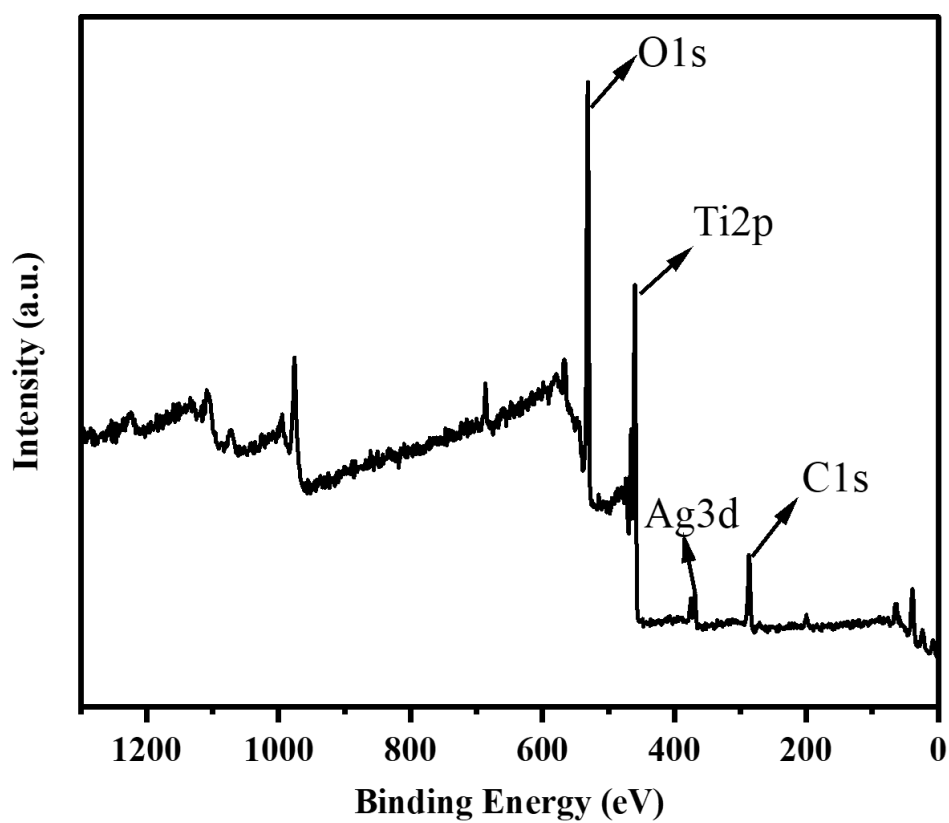

Figure S3. An XPS spectrum of 0.001Ag/TiO<sub>2-x</sub>.

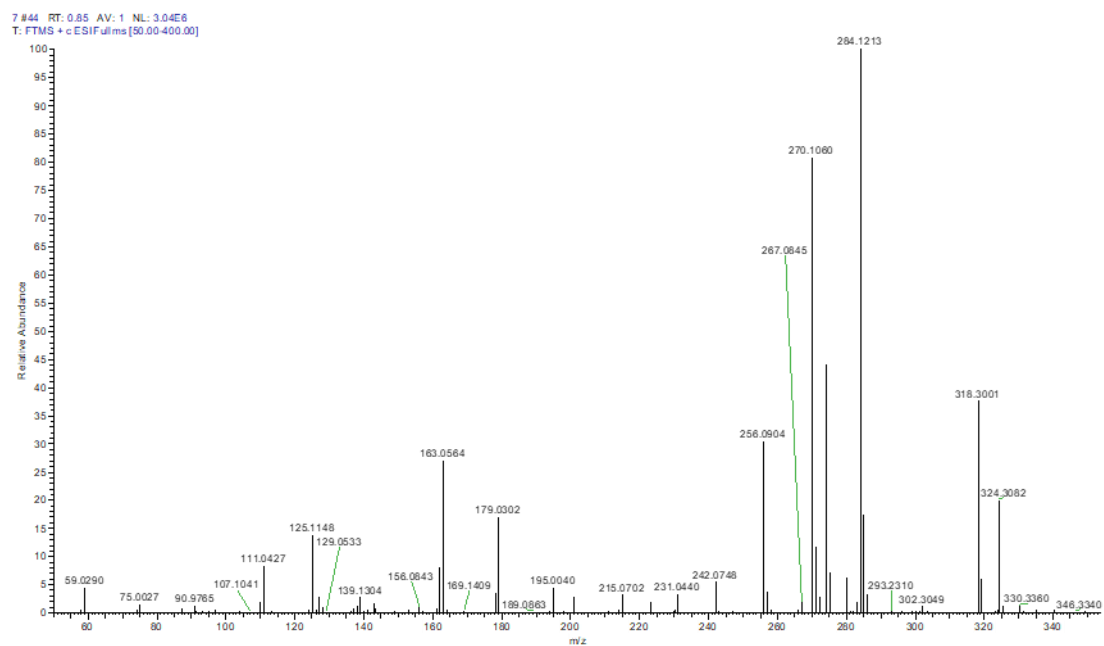

Fig. S4. Full-scan MS spectrum of MB after 30 min photocatalytic reaction by 0.001Ag/TiO<sub>2-x</sub>.

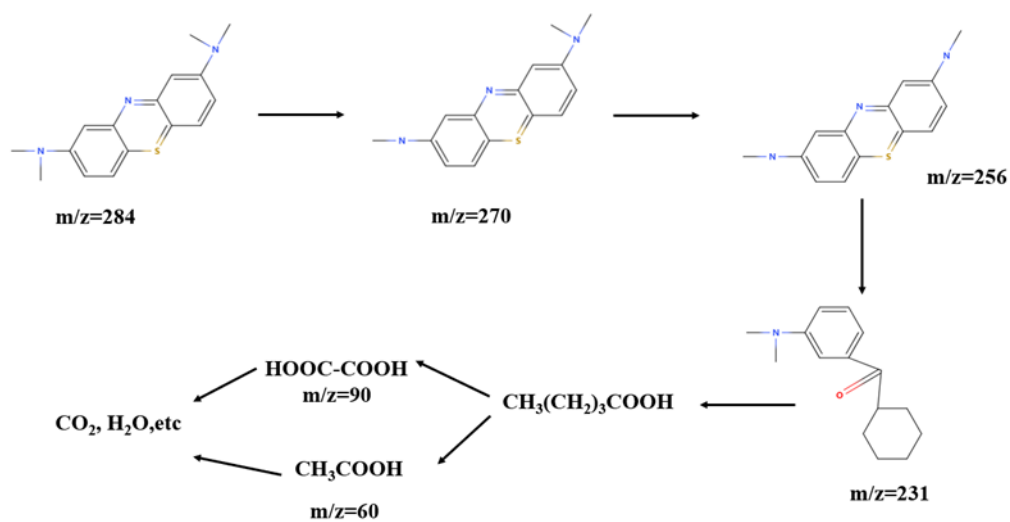

Fig. S5. Pathway of MB degradation by 0.001Ag/TiO<sub>2-x</sub>.

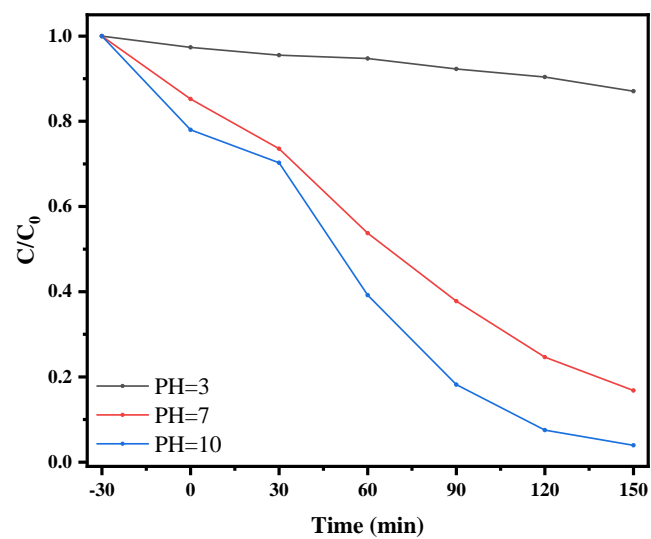

Fig. S6. Effect of solution pH on the performance of 0.001Ag/TiO<sub>2-x</sub>

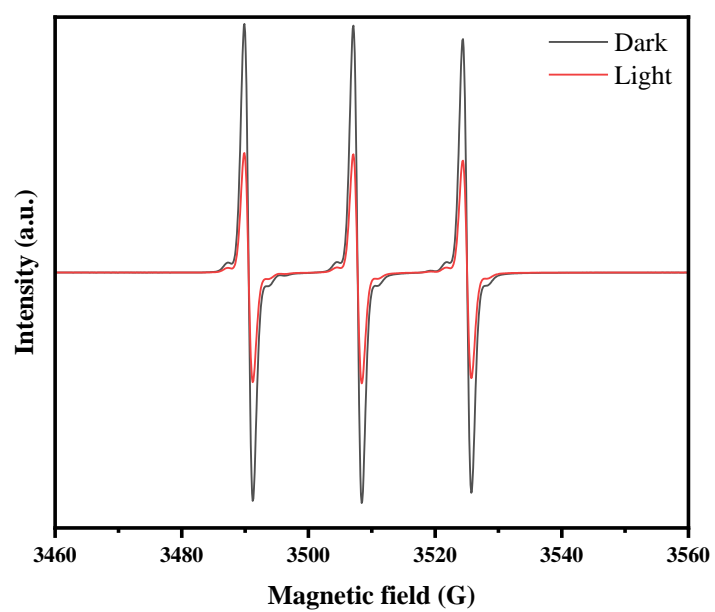

Fig. S7. EPR spectra of 0.001Ag/TiO<sub>2-x</sub> for h<sup>+</sup>

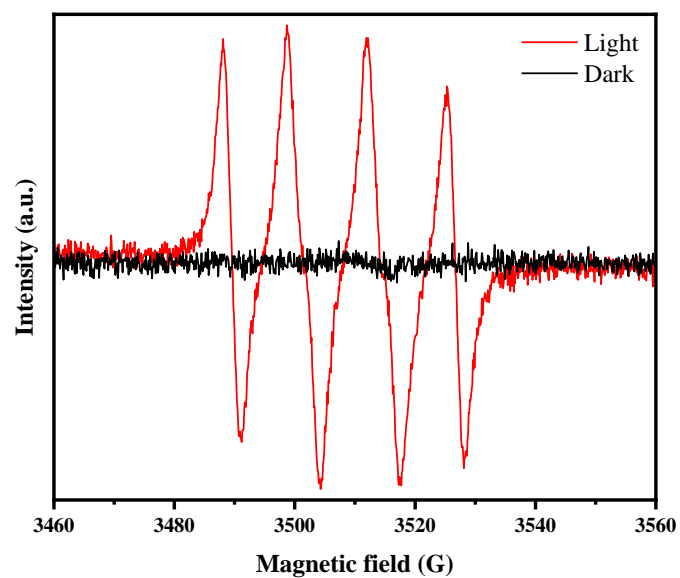

Fig. S8. EPR spectra of 0.001Ag/TiO<sub>2-x</sub> for •O<sub>2</sub><sup>-</sup>

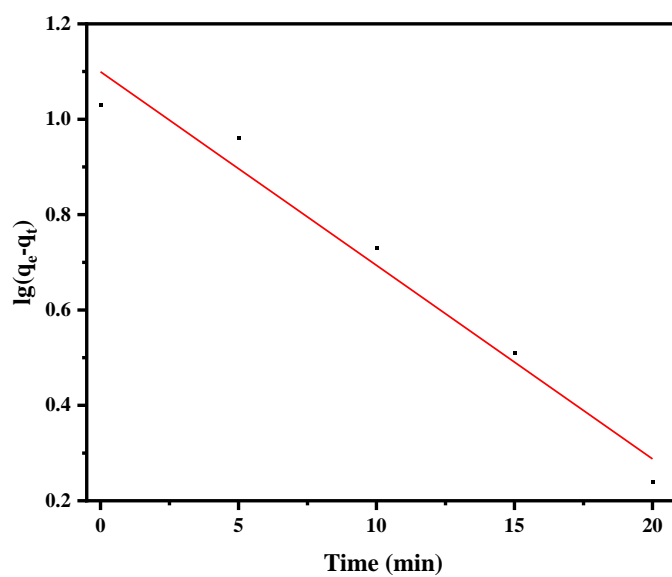

Fig. S9. Linear fitting curves of the pseudo-first-order kinetic model

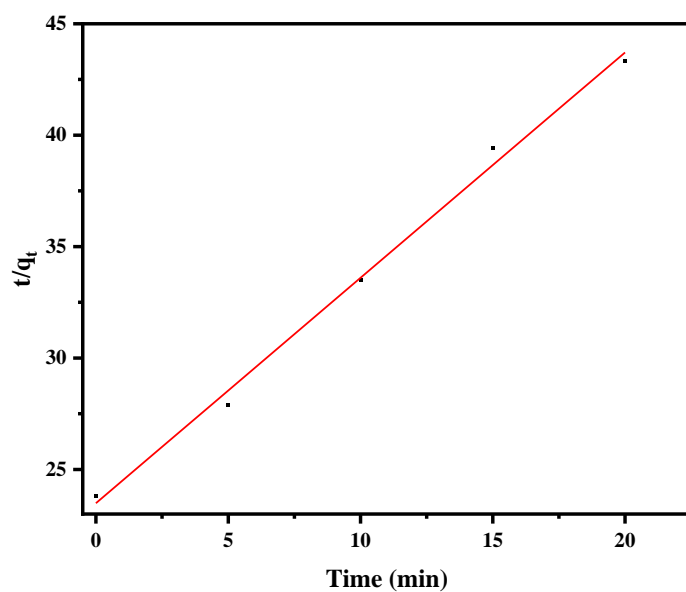

Fig. S10. Linear fitting curves of the pseudo-second-order kinetic model

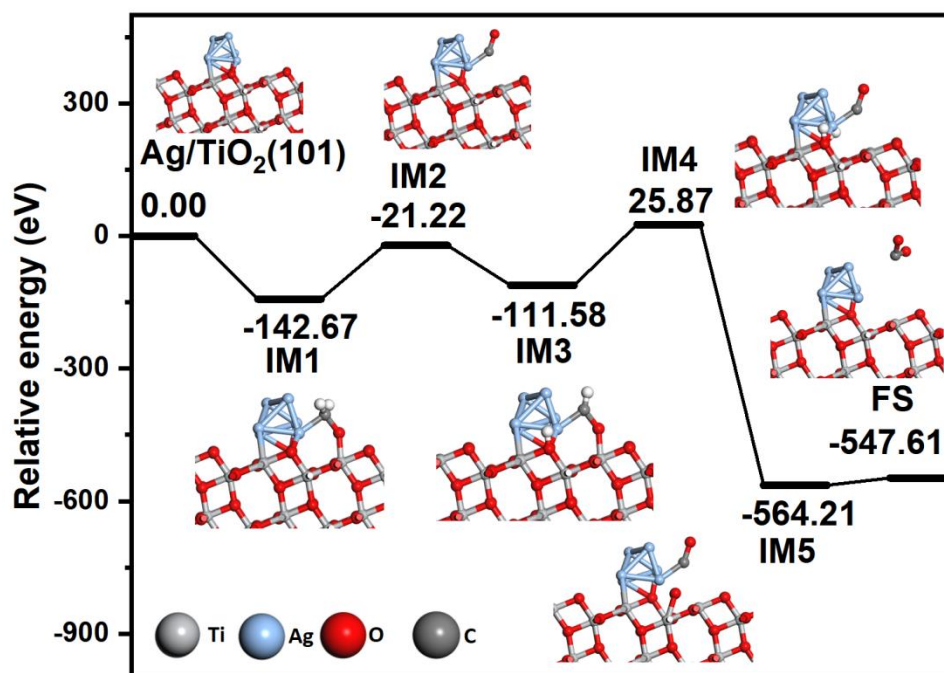

Fig. S11. Energy distribution and optimized structure of HCHO oxidation on 0.001Ag/TiO<sub>2-x</sub>(101) surface.
